# Supplementary material for: Measurement Report: Bio-physicochemistry of tropical clouds at Maïdo (Réunion Island, Indian Ocean): overview of results from the BIO-MAÏDO campaign
Source: Copernicus journal article supplement (doi:10.5194/egusphere-2023-1362), 2023-08-01
Supplement: Supplementary file 1 [file egusphere-2023-1362-supplement.pdf]

**Supplementary material for:**

**Measurement Report: Bio-physicochemistry of tropical  
clouds at Maïdo (Réunion Island, Indian Ocean):  
overview of results from the BIO-MAÏDO campaign**

*Leriche et al.*

**Table S1. Daily operation of instruments deployed during the campaign. Code 0 = non data, code 1 = normal operation, code 2 = discontinuous operation, code 3 = degraded performance**

|                              | 13/03/2019 | 14/03/2019 | 15/03/2019 | 16/03/2019 | 17/03/2019 | 18/03/2019 | 19/03/2019 | 20/03/2019 | 21/03/2019 | 22/03/2019 | 23/03/2019 | 24/03/2019 |
|------------------------------|------------|------------|------------|------------|------------|------------|------------|------------|------------|------------|------------|------------|
| PF NOx, NO, NO2, O3          | 2          | 1          | 1          | 1          | 1          | 1          | 1          | 1          | 1          | 2          | 1          | 1          |
| PF PM2.5                     | 2          | 1          | 1          | 1          | 1          | 1          | 1          | 1          | 2          | 2          | 1          | 1          |
| PF SO2                       | 2          | 2          | 2          | 2          | 2          | 2          | 2          | 2          | 2          | 2          | 2          | 2          |
| PF T, RH                     | 2          | 1          | 1          | 1          | 1          | 1          | 1          | 1          | 1          | 2          | 1          | 1          |
| PF wind                      | 2          | 1          | 1          | 1          | 1          | 1          | 1          | 1          | 2          | 2          | 1          | 1          |
| PF CO                        | 2          | 2          | 2          | 2          | 2          | 2          | 2          | 2          | 2          | 2          | 0          | 0          |
| PF CPC                       | 0          | 0          | 0          | 0          | 0          | 0          | 0          | 0          | 0          | 0          | 0          | 0          |
| PF PAR                       | 1          | 2          | 2          | 2          | 2          | 2          | 1          | 1          | 1          | 1          | 1          | 1          |
| PF PTR-MS                    | 2          | 1          | 1          | 1          | 1          | 0          | 0          | 0          | 0          | 2          | 2          | 0          |
| PF HVS PM10                  | 1          | 1          | 1          | 1          | 1          | 1          | 1          | 1          | 1          | 1          | 1          | 1          |
| PF ceilometer                | 2          | 1          | 1          | 1          | 1          | 1          | 1          | 1          | 1          | 1          | 1          | 1          |
| PF HCHO                      | 0          | 0          | 0          | 0          | 0          | 0          | 0          | 0          | 0          | 0          | 0          | 0          |
| DOS CPC                      | 1          | 1          | 1          | 1          | 1          | 1          | 1          | 1          | 1          | 1          | 1          | 1          |
| DOS SMPS                     | 1          | 1          | 1          | 1          | 1          | 1          | 1          | 1          | 1          | 1          | 1          | 1          |
| DOS CNCN                     |            | 1          | 1          | 1          | 1          | 1          | 1          | 1          | 1          | 1          | 1          | 1          |
| DOS OPC                      | 1          | 1          | 1          | 1          | 1          | 1          | 1          | 1          | 1          | 1          | 1          | 1          |
| DOS Welas                    | 1          | 1          | 1          | 1          | 1          | 1          | 1          | 1          | 1          | 1          | 1          | 1          |
| DOS Fog Monitor              | 1          | 1          | 0          | 0          | 0          | 0          | 0          | 0          | 0          | 2          | 1          | 1          |
| DOS LIDAR                    | 2          | 0          | 0          | 0          | 0          | 0          | 2          | 1          | 1          | 2          | 0          | 0          |
| DOS ceilometer               | 0          | 0          | 0          | 0          | 0          | 0          | 2          | 1          | 1          | 1          | 1          | 1          |
| DOS PWD                      | 0          | 0          | 0          | 0          | 0          | 1          | 1          | 1          | 1          | 1          | 1          | 1          |
| DOS balloon                  | 1          | 1          | 1          | 0          | 0          | 1          | 1          | 1          | 0          | 0          | 1          | 1          |
| HM all except PTR-MS and SAS | 1          | 1          | 1          | 1          | 1          | 1          | 1          | 1          | 1          | 1          | 1          | 1          |
| HM PTR-MS                    | 3          | 3          | 3          | 3          | 3          | 3          | 3          | 3          | 3          | 3          | 3          | 3          |
| HM SASS                      | 0          | 0          | 0          | 0          | 0          | 1          | 1          | 1          | 1          | 1          | 1          | 1          |
| PO cloud sampling            | 0          | 1          | 1          | 0          | 0          | 1          | 1          | 0          | 1          | 1          | 0          | 0          |
| MO. ACSM                     | 1          | 1          | 1          | 1          | 1          | 1          | 1          | 1          | 1          | 1          | 1          | 1          |
| MO HCHO                      | 2          | 2          | 2          | 2          | 2          | 2          | 2          | 2          | 2          | 2          | 1          | 1          |
| MO Fog Monitor               | 1          | 1          | 1          | 1          | 1          | 1          | 1          | 1          | 1          | 0          | 0          | 0          |
| MO others                    | 1          | 1          | 1          | 1          | 1          | 1          | 1          | 1          | 1          | 1          | 1          | 1          |
| MO O3, SO2                   | 1          | 1          | 1          | 1          | 1          | 1          | 1          | 1          | 2          | 1          | 1          | 1          |
| MO CO                        | 2          | 1          | 1          | 1          | 1          | 1          | 1          | 1          | 2          | 1          | 1          | 1          |
| MO CPC                       | 0          | 0          | 2          | 1          | 1          | 1          | 1          | 1          | 1          | 1          | 1          | 1          |
| MO PTR-MS                    | 1          | 1          | 1          | 1          | 1          | 2          | 2          | 1          | 1          | 1          | 1          | 1          |
| MO HVS PM10                  | 1          | 1          | 1          | 1          | 1          | 1          | 1          | 1          | 1          | 1          | 1          | 1          |

|                              | 25/03/2019 | 26/03/2019 | 27/03/2019 | 28/03/2019 | 29/03/2019 | 30/03/2019 | 31/03/2019 | 01/04/2019 | 02/04/2019 | 03/04/2019 | 04/04/2019 |
|------------------------------|------------|------------|------------|------------|------------|------------|------------|------------|------------|------------|------------|
| PF NOx, NO, NO2, O3          | 1          | 1          | 2          | 2          | 2          | 1          | 1          | 1          | 1          | 1          | 1          |
| PF PM2.5                     | 1          | 1          | 1          | 1          | 2          | 1          | 1          | 1          | 1          | 1          | 1          |
| PF SO2                       | 2          | 2          | 0          | 2          | 2          | 2          | 2          | 2          | 2          | 2          | 2          |
| PF T, RH                     | 1          | 1          | 0          | 2          | 2          | 1          | 1          | 1          | 1          | 1          | 1          |
| PF wind                      | 1          | 1          | 2          | 2          | 2          | 1          | 1          | 2          | 1          | 1          | 1          |
| PF CO                        | 2          | 2          | 2          | 2          | 2          | 2          | 2          | 2          | 2          | 2          | 2          |
| PF CPC                       | 0          | 0          | 0          | 0          | 0          | 0          | 0          | 1          | 1          | 1          | 1          |
| PF PAR                       | 1          | 2          | 1          | 1          | 1          | 1          | 2          | 1          | 1          | 1          | 1          |
| PF PTR-MS                    | 0          | 0          | 0          | 1          | 3          | 3          | 1          | 1          | 1          | 1          | 2          |
| PF HVS PM10                  | 1          | 1          | 1          | 1          | 1          | 1          | 1          | 1          | 1          | 1          | 1          |
| PF ceilometer                | 1          | 1          | 1          | 1          | 1          | 1          | 1          | 1          | 1          | 1          | 1          |
| PF HCHO                      | 0          | 0          | 0          | 2          | 3          | 2          | 1          | 2          | 2          | 1          | 1          |
| DOS CPC                      | 1          | 1          | 1          | 1          | 1          | 1          | 2          | 2          | 1          | 1          | 1          |
| DOS SMPS                     | 1          | 1          | 1          | 1          | 1          | 1          | 2          | 1          | 1          | 1          | 1          |
| DOS CNCN                     | 1          | 1          | 1          | 1          | 3          | 2          | 1          | 1          | 1          | 1          | 1          |
| DOS OPC                      | 1          | 1          | 1          | 1          | 1          | 1          | 1          | 1          | 1          | 1          | 1          |
| DOS Welas                    | 1          | 1          | 1          | 1          | 2          | 0          | 2          | 1          | 1          | 1          | 1          |
| DOS Fog Monitor              | 1          | 1          | 1          | 1          | 0          | 1          | 1          | 1          | 1          | 1          | 1          |
| DOS LIDAR                    | 0          | 2          | 1          | 2          | 0          | 0          | 0          | 2          | 3          | 3          | 3          |
| DOS ceilometer               | 1          | 1          | 2          | 1          | 1          | 1          | 2          | 2          | 2          | 2          | 2          |
| DOS PWD                      | 1          | 1          | 1          | 1          | 1          | 1          | 2          | 2          | 1          | 1          | 0          |
| DOS balloon                  | 0          | 1          | 1          | 1          | 1          | 1          | 0          | 1          | 1          | 1          | 1          |
| HM all except PTR-MS and SAS | 1          | 1          | 1          | 1          | 1          | 1          | 1          | 1          | 1          | 1          | 1          |
| HM PTR-MS                    | 3          | 3          | 3          | 3          | 3          | 2          | 1          | 1          | 2          | 1          | 1          |
| HM SASS                      | 0          | 1          | 1          | 1          | 1          | 1          | 1          | 1          | 1          | 1          | 1          |
| PO cloud sampling            | 0          | 1          | 0          | 1          | 0          | 1          | 0          | 1          | 1          | 1          | 1          |
| MO. ACSM                     | 1          | 1          | 1          | 1          | 1          | 1          | 1          | 1          | 1          | 1          | 2          |
| MO HCHO                      | 2          | 2          | 0          | 0          | 0          | 0          | 0          | 0          | 0          | 0          | 0          |
| MO Fog Monitor               | 0          | 0          | 0          | 0          | 0          | 0          | 0          | 0          | 0          | 0          | 0          |
| MO others                    | 1          | 1          | 1          | 1          | 1          | 1          | 1          | 1          | 1          | 1          | 1          |
| MO O3, SO2                   | 1          | 1          | 1          | 1          | 1          | 1          | 1          | 1          | 1          | 1          | 1          |
| MO CO                        | 1          | 1          | 1          | 1          | 1          | 1          | 0          | 1          | 1          | 1          | 1          |
| MO CPC                       | 1          | 1          | 1          | 1          | 1          | 1          | 1          | 1          | 1          | 1          | 0          |
| MO PTR-MS                    | 1          | 1          | 1          | 1          | 1          | 1          | 1          | 1          | 2          | 1          | 1          |
| MO HVS PM10                  | 1          | 1          | 1          | 1          | 1          | 1          | 1          | 1          | 1          | 1          | 1          |

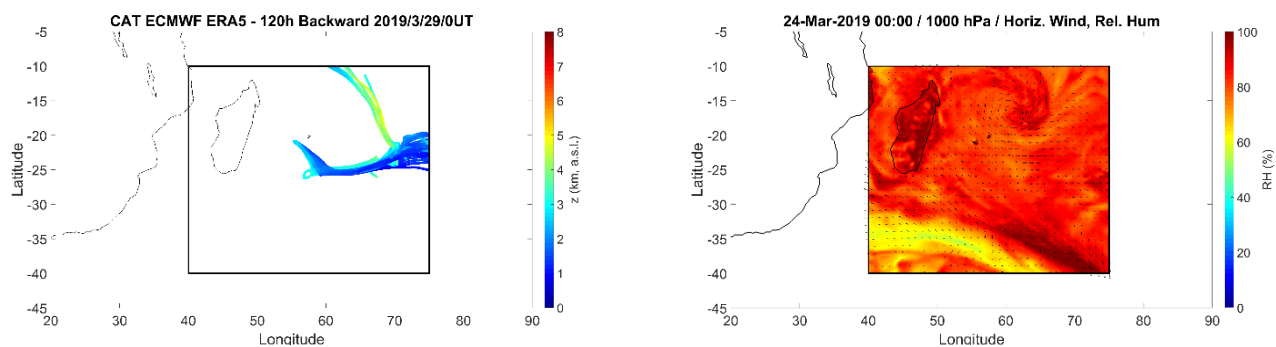

**Figure S1. (a) 5 days back-trajectories arriving to Réunion island calculated with CAT and ECMWF wind fields from the 28 March 2019 at 00 UTC. (b) Horizontal wind field (arrows) and relative humidity (color scale) at 1000hPa the 24<sup>th</sup> of March 2019 at 00 UTC.**
